# Supplementary material for: Electrochemical sensor propelled by exonuclease III for highly efficient microRNA-155 detection
Source: Royal Society of Chemistry journal article supplement (doi:10.1039/d2an01274j), 2022-01-01
Supplement: d2an01274j1.pdf [file d2an01274j1.pdf]

## Supporting Information

### **Exonuclease III-propelled electrochemical sensor for highly efficient microRNA-155 detection**

Bingyin Yan, Xiangjiang Zheng\*, Pengfei Shi\*

#### **Materials and methods**

##### **Materials and Reagents**

Acrylamide, Tris(hydroxymethyl)aminomethane, 6-mercapto-1-hexanol (MCH) were obtained from Macklin (Shanghai, China). DEPC water, Rnase Inhibitor, Tris (2-carboxyethyl) phosphine hydrochloride (TCEP), 1×TE buffer, were obtained from Sangon Biotechnology Co., Ltd. (Shanghai, China). N,N,N',N'-Tetramethylethylenediamine (TEMED), Methylene blue (MB) was obtained from Aladdin biochemical technology Co., Ltd. (Shanghai, China). Exo-III was purchased from New England Biolabs (NEB). All other reagents were of analytical grade. All DNAs, miRNAs and DNA Marker A (25-500 bp) were custom-synthesized by Sangon Biotechnology Co., Ltd. (Shanghai, China), and the sequence of oligonucleotides were listed in Table S1. All the solutions were prepared by ultrapure water from Milli-Q water system with 18.25 MΩ.

##### **Apparatus**

Electrochemical measurements were performed on electrochemistry workstation (CHI660E, Shanghai Chenhua, China) with a conventional three-electrode system, a modified gold electrode (AuE) as working electrode, a platinum wire as counter electrode, a Ag/AgCl as reference electrode and. Polyacrylamide gel electrophoresis (PAGE) were realized using electrophoresis apparatus (BIO RAD). Gels imaging was performed using WD-9413B gel image system (Beijing, China).

##### **Exonuclease III assisted double enzyme amplification reaction**

Prior to the start of the experiment, all hairpin DNA were heated to 95 °C, maintained for 5 min, and then slowly cooled to room temperature to ensure that the DNA formed a stable structure. For Exo-III enzymatic amplification reaction, at first, HP1, HP2, Rnase Inhibitor (2 $\mu$ L), and different concentration of miRNA-155 with Exo-III (2U/ $\mu$ L) were incubated separately in Tris buffer (prepared with DEPC water, including 10 mM Tris, 0.1 M NaCl, 0.01 M MgCl<sub>2</sub> • 6H<sub>2</sub>O, pH 7.4, ) for 90 min at 37 °C, then heated to 70 °C for 30 minutes to inactivate Exo-III enzyme. The reaction mixture stored at 4 °C before use.

### **Native Polyacrylamide Gel Electrophoresis**

Sterilized water 5.68 mL, 3.5 mL of acrylamide gel (30%), 200  $\mu$  L of 50 $\times$  TAE (Tris Acetate-EDTA buffer), 100  $\mu$  L of 10% ammonium persulfate and 5  $\mu$  L of TEMED were mixed well formation acrylamide gel (10%) and added to the gel glass plate and placed at 37 °C for 30min to solidify the acrylamide gel. Different samples (5  $\mu$ L) were mixed separately with 1  $\mu$ L of DNA loading buffer (6 $\times$ ), and transferred into acrylamide gel (10%). The electrophoresis process was running under 1 $\times$  TAE (40 mM Tris, 20 mM HAc, 1 mM EDTA, pH 8.0) at a voltage of 100V for 1h, then the gel was placed in 4S Red Plus (3 $\times$ ) to stain for 30min, and finally imaged under gel imager for analysis.

### **Construction of electrochemical Sensor**

Gold electrodes were polished with 0.3  $\mu$ m and 0.05  $\mu$ m alumina paste in turn. The electrodes were cleaned by ultrasonic in ultrapure water for three minutes, and then washed by anhydrous ethanol, ultrapure water in turn, dried with nitrogen gas. Finally, the electrode was cleaned in 0.5 M H<sub>2</sub>SO<sub>4</sub> until a stable cyclic voltammetry curve was obtained. SH-HP (2  $\mu$ M) and TCEP (40  $\mu$ M) were mixed and incubated at room temperature for 1 h to remove the S-S bonds, and then the SH-HP 10  $\mu$ L was dropped on the electrodes overnight at 4°C, to formation the SH-HP/AuE. Thereafter,

10  $\mu$ L MCH was dropped on the AuE for 1h at room temperature to occupy additional sites. Next 10  $\mu$ L of the reaction mixture was dropped on MCH/SH-HP/ AuE for 1 h. HP3 was mixed with HP4 and dropped on the electrode for 90 min, and methylene blue (MB) was dropped on the surface for 30 min to embed into the dsDNA. After each step of the above reactions, the electrode was washed with ultrapure water and dried. Differential pulse voltammetry (DPV) was measured in 10 $\times$  PBS. Electrochemical impedance spectroscopy (EIS) experiments in 5 mM Fe(CN)<sub>6</sub><sup>3-/4-</sup> solutions containing 100 mM KCl, recorded at a stable open circuit potential (OCP) in the frequency range from 0.1 Hz to 100 kHz.

### Electrochemical detection in real samples

In order to evaluate the detection effect in actual samples, we added different concentrations of miRNA-155 into in dilution solution of human serum samples that were obtained from Linyi People's Hospital and diluted 500-fold with DEPC treated water, and used it for electrochemical detection after full and uniform shaking. The experimental procedure was the same as above. Three groups of experiments were performed for each concentration to calculate the relative deviation.

The reproducibility and stability experiments are performed in the same way as the sensor property studies.

**Table S1.** All sequences used in experiment.

| Name  | Sequence (5'-3')                                                   |
|-------|--------------------------------------------------------------------|
| HP1   | ATC ACG TCA GCG ACT GTG AAA AAAA CAC AGT<br>CGC TGA ATT AGC ATT AA |
| HP2   | TTAAT GCA CCA GC TAAA TCC GCT GCTGG TGC<br>ATTAA CAC AGT CGC TGA   |
| HP3   | AGCGGATTTA GCTGGTGCATTAA CACCTTTGCC<br>TTAATGCACCAGC               |
| SH-HP | AGCGGATTTA GCTGGTGCATTAA CACCTTTGCC<br>TTAATGCACCAGC               |

|                                                        |                                                                |
|--------------------------------------------------------|----------------------------------------------------------------|
| HP4                                                    | TTAAT GCA CCA GC TAAA TCC GCT GCT GGT GCA<br>TTAA GGC AAA GGTG |
| miRNA-155                                              | UUA AUG CUA AUC GUG AUA GGG GU                                 |
| miRNA-141                                              | UAA CAC UGU CUG GUA AAG AUG G                                  |
| miRNA-21                                               | UAG CUU AUC AGA CUG AUG UUG A                                  |
| Single-base<br>matched<br>miRNA<br>15 (smiRNA-<br>155) | UUA AUG CUA AUA GUG AUA GGG GU                                 |
| Triplex-base<br>matched<br>miRNA 155<br>(tmiRNA-155)   | UUA AUA CUA AUA GUG AUC GGG GU                                 |

**Table S2.** Comparison of various biosensors for detection of target miRNA-155

| Technique    | Amplification strategy                                                    | Linear range   | LOD     | Ref. |
|--------------|---------------------------------------------------------------------------|----------------|---------|------|
| DPV          | THD/TSDR                                                                  | 5 fM - 100 pM  | 0.27 fM | 1    |
| ICP-MS       | multicomponent nucleic acid<br>enzymes (MNAzymes)/<br>lanthanide labeling | 50 pM - 2nM    | 11 pM   | 2    |
| DPV          | 3D DNA origami enzymatic<br>amplification                                 | 100 pM - 1 μM  | 10 pM   | 3    |
| DPV          | GNR/GO                                                                    | 2.0fM - 8.0pM  | 0.6 fM  | 4    |
| Fluorescence | CHA/AgNCs                                                                 | 200 pM - 20 nM | 200 pM  | 5    |
| PEC          | ZnIn <sub>2</sub> S <sub>4</sub> /DSN                                     | 100 fM - 10 nM | 33 fM   | 6    |

|              |                                  |                 |         |           |
|--------------|----------------------------------|-----------------|---------|-----------|
| ECL          | nitrogen dots/AuNRs              | 1 fM - 10 nM    | 0.33 fM | 7         |
| Fluorescence | MnO <sub>2</sub> /DNAzyme        | 10 pM - 10 nM   | 1.6 pM  | 8         |
| DPV          | Tetrahedral DNA                  | 1 pM – 100 μM   | 1 pM    | 9         |
| Fluorescence | DNA-CuNC                         | 50 pM - 10 nM   | 11 pM   | 10        |
| Fluorescence | MWCNT/AuNCs                      | 100 fM - 5 nM   | 33.4fM  | 11        |
| Fluorescence | DNA polymerase /G-quadruplex/ThT | 0.1 pM - 100 pM | 35 fM   | 12        |
| DPV          | AuNPs@MoS <sub>2</sub>           | 1 fM - 100 nM   | 0.32fM  | 13        |
| SWV          | AuNPs/GQDs/GO                    | 1 fM - 1 nM     | 0.33fM  | 14        |
| DPV          | Exo III/HCR                      | 0.1 fM - 0.1 nM | 35 aM   | this work |

---

## Reference

1. Y. Xue, Y. Wang, S. Feng, M. Yan, J. Huang, X. Yang. *Anal. Chem.*, 2021, **93**, 8962-8970.
2. Q. Kang, M. He, B. Chen, G. Xiao, B. Hu. *Anal. Chem.*, 2021, **93**, 737-744.
3. S. Liu, W. Su, Z. Li, X. Ding. *Biosens. Bioelectron.*, 2015, **71**, 57-61.
4. M. Azimzadeh, M. Rahaie, N. Nasirizadeh, K. Ashtari, H. Naderi-Manesh. *Biosens. Bioelectron.*, 2016, **77**, 99-106.
5. J. Gu, Z. Qiao, X. He, Y. Yu, Y. Lei, J. Tang, H. Shi, D. He, K. Wang. *Analyst*, 2020, **145**, 5194-5199.
6. H. Liu, S. Ai, Y. Liu, H. Zeng, H. Da, Y. Liu, Y. Chai, R. Yuan. *Chem. Comm.*,

2020, **56**, 14275-14278.

7. Z. Liang, J. Zhao, P. Wang, Y. Nie, S. Xu, Q. Ma. *Anal. Chem.*, 2022, **94**, 1221-1229.

8. Y. Zhang, C. Ma, C. Ma, Y. Xiang, S. Mu, Z. Zheng, X. Liu, H. Zhang. *Talanta*, 2021, **233**, 122518.

9. R. Tian, W. Ning, M. Chen, C. Zhang, Q. Li, J. Bai. *Talanta*, 2019, **194**, 273-281.

10. Y. S. Borghei, M. Hosseini, M. R. Ganjali. *Microchim. Acta*, 2017, **184**, 2671-2677.

11. H. Ma, N. Xue , Z. Li, K. Xing, X. Miao. *Sens. Actuators B Chem.*, 2018, **266**, 221-227.

12. J. He, T. Zhang, B. Jiang, Y.un Xiang, R. Yuan. *Talanta*, 2020, **210**, 120651.

13. L. Liu, S. Zhu, Y. Wei, X. Liu, S. Jiao, J. Yang. *Biosens. Bioelectron.*, 2019, **144**, 1111660.

14. C. Pothipor, J. Jakmune, S. Bamrungsap, K. Ounnunkad. *Analyst*, 2021,**146**, 4000-4009.
